# Supplementary material for: MicroRNA-146a Serves as a Biomarker for Adverse Prognosis of ST-Segment Elevation Myocardial Infarction
Source: Hindawi journal article supplement (doi:10.1155/2021/2923441), 2021-10-25
Supplement: f6 [file 2923441.f6.pdf]

Supplementary Table S6. Gene Ontology analysis of the DEGs.

| ID                        | Term                           | Count | <i>P</i> -value | Genes                                                                                                                                                       |
|---------------------------|--------------------------------|-------|-----------------|-------------------------------------------------------------------------------------------------------------------------------------------------------------|
| <b>Biological Process</b> |                                |       |                 |                                                                                                                                                             |
| GO:0006955                | immune response                | 22    | 3.02E-09        | IL1R2, GZMA, SLC11A1, AQP9, NCF4, C5AR1, HLA-C, LTB4R, GZMH, ZAP70, FCGR3B, IL18RAP, NFIL3, CD8A, BPI, PGLYRP1, TLR4, LAT, IL18R1, HLA-DQA1, HLA-DRB1, TLR2 |
| GO:0045087                | innate immune response         | 20    | 1.22E-07        | CR1, NCF1, HMGB2, MATK, HLA-C, BMX, TREM1, ZAP70, GZMM, CLEC4D, S100A12, PADI4, PGLYRP1, CLEC4E, CD46, TLR4, CD55, CAMP, KLRG1, TLR2                        |
| GO:0006954                | inflammatory response          | 18    | 4.75E-07        | ORM1, SLC11A1, C5AR1, FPR1, FOS, PTGS2, LTB4R, NDST1, TPST1, ZAP70, MMP25, IL18RAP, PROK2, S100A12, TLR4, LAT, KLRG1, TLR2                                  |
| GO:0032496                | response to lipopolysaccharide | 10    | 5.60E-05        | SLC11A1, C5AR1, PELI1, HMGB2, ALPL, IRAK3, FOS, PTGS2,                                                                                                      |

|            |                                                                     |   |             |                                                                |
|------------|---------------------------------------------------------------------|---|-------------|----------------------------------------------------------------|
|            |                                                                     |   |             | TLR4, TLR2                                                     |
| GO:0042742 | defense response<br>to bacterium                                    | 8 | 8.16E-04    | CLEC4D, GNLY, SLC11A1,<br>BCL3, S100A12, CLEC4E,<br>TLR4, CAMP |
| GO:0006935 | chemotaxis                                                          | 7 | 0.001753706 | CX3CR1, C5AR1, PLAUR,<br>FPR1, PROK2, CMTM2,<br>CXCL16         |
| GO:0002250 | adaptive immune<br>response                                         | 7 | 0.004576779 | EOMES, ZAP70, CLEC4D,<br>CD46, LILRA2, LILRA3, LAT             |
| GO:0045730 | respiratory burst                                                   | 6 | 1.40E-07    | CD52, NCF1, SLC11A1,<br>NCF1B, NCF1C, CD55                     |
| GO:0050830 | defense response to<br>Gram-positive<br>bacterium                   | 6 | 0.001944214 | C5AR1, HMGB2, PGLYRP1,<br>CAMP, HIST2H2BE, TLR2                |
| GO:0071222 | cellular response to<br>lipopolysaccharide                          | 6 | 0.006593787 | CX3CR1, ARG1, HMGB2,<br>TLR4, CAMP, CXCL16                     |
| GO:0007204 | positive regulation<br>of<br>cytosolic calcium<br>ion concentration | 6 | 0.013188023 | CD52, C5AR1, FPR1,<br>PROK2, UTS2, CD55                        |
| GO:0050776 | regulation of<br>immune response                                    | 6 | 0.038629645 | KLRB1, CD8A, HLA-C,<br>ITGB7, TREM1, CD3D                      |
| GO:0030890 | positive regulation<br>of<br>B cell proliferation                   | 5 | 7.05E-04    | BST1, PELI1, IRS2,<br>TLR4, ADA                                |
| GO:0050829 | defense response to<br>Gram-negative<br>bacterium                   | 5 | 0.002569748 | SLC11A1, HMGB2,<br>BPI, TLR4, CAMP                             |
| GO:0019882 | antigen processing<br>and presentation                              | 5 | 0.002569748 | CD8A, RAB27A, HLA-C,<br>HLA-DRB1, HLA-DQA1                     |

|            |                                                                  |   |             |                                   |
|------------|------------------------------------------------------------------|---|-------------|-----------------------------------|
| GO:0006968 | cellular defense response                                        | 5 | 0.003973065 | CX3CR1, NCF1, GNLY, C5AR1, KLRG1  |
| GO:0046718 | viral entry into host cell                                       | 5 | 0.009751936 | CR1, ANPEP, ITGB7, CD46, CD55     |
| GO:0043085 | positive regulation of catalytic activity                        | 5 | 0.010176964 | NCF1, ALOX5AP, NCF4, NCF1B, NCF1C |
| GO:0007169 | transmembrane receptor protein tyrosine kinase signaling pathway | 5 | 0.01803326  | ZAP70, CD8A, MATK, GAB2, BMX      |
| GO:0045766 | positive regulation of angiogenesis                              | 5 | 0.032292487 | CX3CR1, LRG1, C5AR1, UTS2, CAMP   |
| GO:0050900 | leukocyte migration                                              | 5 | 0.038828473 | C5AR1, FPR1, CD58, TREM1, MMP9    |
| GO:0042346 | positive regulation of NF-kappaB import into nucleus             | 4 | 0.00128885  | PTGS2, TLR4, IL18R1, TLR2         |
| GO:0032715 | negative regulation of interleukin-6 production                  | 4 | 0.003009417 | ORM1, IRAK3, BPI, TLR4            |
| GO:0030449 | regulation of complement activation                              | 4 | 0.003673224 | CR1, C5AR1, CD46, CD55            |
| GO:0032720 | negative regulation of tumor necrosis factor production          | 4 | 0.007182176 | ORM1, IRAK3, BPI, TLR4            |
| GO:0032729 | positive regulation of interferon-gamma                          | 4 | 0.012164594 | SLC11A1, BCL3, TLR4, IL18R1       |

|            |                                                                           |   |             |                           |
|------------|---------------------------------------------------------------------------|---|-------------|---------------------------|
|            | production                                                                |   |             |                           |
| GO:0042110 | T cell activation                                                         | 4 | 0.01289626  | ZAP70, CD8A, LAT, ADA     |
| GO:0060326 | cell chemotaxis                                                           | 4 | 0.030346256 | NOV, C5AR1, FPR1, HMGB2   |
| GO:0045454 | cell redox homeostasis                                                    | 4 | 0.046473672 | NCF1, SLC11A1, NCF4, CAMP |
| GO:0042088 | T-helper 1 type                                                           | 3 | 0.006654696 | BCL3, TLR4, HLA-DRB1      |
|            | immune response                                                           |   |             |                           |
| GO:0006691 | leukotriene                                                               | 3 | 0.010372297 | ALOX5AP, CYP4F3, TLR2     |
|            | metabolic process                                                         |   |             |                           |
| GO:0045664 | regulation of neuron                                                      | 3 | 0.018140886 | EOMES, BIN1, CDK5R1       |
|            | differentiation                                                           |   |             |                           |
| GO:0050850 | positive regulation of calcium-mediated signaling                         | 3 | 0.018140886 | ZAP70, CD8A, ADA          |
| GO:0006801 | superoxide                                                                | 3 | 0.018140886 | NCF1, NCF1B, NCF1C        |
|            | metabolic process                                                         |   |             |                           |
| GO:0019835 | cytolysis                                                                 | 3 | 0.019914784 | GZMM, GZMA, GZMH          |
| GO:0045987 | positive regulation of smooth muscle contraction                          | 3 | 0.019914784 | PROK2, PTGS2, ADA         |
| GO:0032733 | positive regulation of interleukin-10 production                          | 3 | 0.023669402 | CD46, TLR4, TLR2          |
| GO:0045742 | positive regulation of epidermal growth factor receptor signaling pathway | 3 | 0.025646901 | HIP1, PLAUR, MMP9         |
| GO:0010575 | positive regulation of vascular endothelial growth                        | 3 | 0.031961368 | C5AR1, PTGS2, SULF2       |

|                           |                                                      |    |             |                                                               |
|---------------------------|------------------------------------------------------|----|-------------|---------------------------------------------------------------|
|                           | factor production                                    |    |             |                                                               |
| GO:0032728                | positive regulation of interferon-beta production    | 3  | 0.031961368 | HMGB2, TLR4, TLR2                                             |
| GO:0043388                | positive regulation of DNA binding                   | 3  | 0.034188441 | PLAUR, HMGB2, MMP9                                            |
| GO:0032689                | negative regulation of interferon-gamma production   | 3  | 0.034188441 | PGLYRP1, TLR4, HLA-DRB1                                       |
| GO:0050873                | brown fat cell differentiation                       | 3  | 0.043668861 | RGS2, LRG1, PTGS2                                             |
| GO:0002755                | MyD88-dependent toll-like receptor signaling pathway | 3  | 0.046174928 | IRAK3, TLR4, TLR2                                             |
| GO:0002374                | cytokine secretion involved in immune response       | 2  | 0.030942012 | TREM1, TLR2                                                   |
| GO:0002292                | T cell differentiation involved in immune response   | 2  | 0.030942012 | CLEC4D, CLEC4E                                                |
| GO:0032613                | interleukin-10 production                            | 2  | 0.030942012 | CD46, TLR2                                                    |
| GO:0045916                | negative regulation of complement activation         | 2  | 0.030942012 | CD46, CD55                                                    |
| GO:0038094                | Fc-gamma receptor signaling pathway                  | 2  | 0.04104298  | CLEC4D, CLEC4E                                                |
| <b>Cellular Component</b> |                                                      |    |             |                                                               |
| GO:0016021                | integral component of membrane                       | 77 | 1.24E-04    | ST6GALNAC2, AQP9, DYSF, SLC40A1, GIMAP5, CD3D, TREM1, TMEM91, |

GO:0005886

plasma membrane

71

1.95E-06

LTB4R, CXCL16, NDST1,  
PANX2, MMP25, FCGR3B,  
SLC22A15, IL18RAP, ANPEP,  
CA4, ITGB7, DIRC2,  
SLC37A3, LBR, CD52,  
CR1, APAF1, MME,  
ACSL1, SLC11A1, IL1R2,  
PLAUR, FLT3LG, HLA-C,  
MCEMP1, CKAP4, TPST1,  
CLEC4D, CD8A, CEACAM4,  
BPI, CLEC4E, CD46,  
RGR, TLR2, B4GALT5,  
SLC22A4, CX3CR1, RTN3,  
KLRB1, FPR1, LILRA2,  
TMEM71, SDCBP, ZDHHC18,  
CHST13, CD58, KIAA0319L,  
TP53I11, HLA-DQA1,  
KLRG1, MGAM, CYP4F3,  
KCNJ15, NKG7, TM6SF1,  
RNF149, CPD, ALOX5AP,  
SLC26A8, ALPL, MANSC1,  
CMTM2, ITM2A, LAT,  
HLA-DRB1, IL18R1,  
MEGF9, SIGLEC5  
AQP9, DYSF, SLC40A1,  
IRS2, PYGL, CD3D,  
TREM1, LTB4R, CXCL16,

|            |                          |    |          |                                                                                                                                                                                                                                                                                                                                                                                                                                                                                                           |
|------------|--------------------------|----|----------|-----------------------------------------------------------------------------------------------------------------------------------------------------------------------------------------------------------------------------------------------------------------------------------------------------------------------------------------------------------------------------------------------------------------------------------------------------------------------------------------------------------|
|            |                          |    |          | PANX2, MMP25, RGS2,<br>FCGR3B, IL18RAP, CA4,<br>ITGB7, CR1, MME, ACSL1,<br>SLC11A1, IL1R2, PLAUR,<br>HLA-C, GAB2, OLFM4,<br>FAM126B, CKAP4, F5,<br>ZAP70, CLEC4D, CD8A,<br>ACOX1, RP2, CLEC4E,<br>CD46, TLR4, TLR2,<br>RGS18, SLC22A4, CX3CR1,<br>RTN3, KLRB1, C5AR1,<br>FPR1, LILRA3, SDCBP,<br>GNG10, S100A12, CD58,<br>KIAA0319L, HLA-DQA1,<br>CD55, KLRG1, MGAM,<br>GCA, KCNJ15, SULF2,<br>BST1, VNN2, VNN3,<br>STK17B, CPD, IL2RB,<br>SLC26A8, ALPL, ITM2A,<br>LAT, HLA-DRB1, ADA,<br>IL18R1, CDK5R1 |
| GO:0070062 | extracellular<br>exosome | 50 | 6.99E-05 | HIST2H2AA3, ORM1,<br>DYSF, PYGL, FCGR3B,<br>ANPEP, CA4, ITGB7,<br>PGLYRP1, TGM3, CAMP,<br>CR1, APAF1, MME,<br>ARG1, PLAUR, HLA-C,                                                                                                                                                                                                                                                                                                                                                                         |

|            |                    |    |          |                                                                                                                                                                                                                                                                                                                                       |
|------------|--------------------|----|----------|---------------------------------------------------------------------------------------------------------------------------------------------------------------------------------------------------------------------------------------------------------------------------------------------------------------------------------------|
|            |                    |    |          | OLFM4, MMP9, HIST2H2BE,<br>CKAP4, CRISPLD2, RP2,<br>BOLA2, BPI, CD46,<br>FKBP5, CREB5, B4GALT5,<br>RTN3, CSTA, NCALD,<br>SDCBP, GNG10, CD58,<br>KIAA0319L, CD55, MGAM,<br>NQO2, GCA, RAB27A,<br>BST1, LRG1, RNF149,<br>QPCT, CPD, HIST1H4H,<br>ALPL, ITM2A, HLA-DRB1                                                                  |
| GO:0016020 | membrane           | 41 | 1.62E-04 | HIP1, NCF4, CXCL16,<br>LMNB1, SDCBP, MMP25,<br>CA4, ITGB7, CD58,<br>LBR, HLA-DQA1, CD52,<br>HSDL2, ACSL1, SLC11A1,<br>KCNJ15, FLT3LG, HLA-C,<br>FOS, CKAP4, F5, GZMH,<br>TPST1, GZMM, LRG1,<br>RNF149, BIN1, ACOX1,<br>CPD, CEACAM4, IL2RB,<br>ALOX5AP, SLC26A8,<br>HIST1H4H, ALPL,<br>FOLR3, LAT, ADA,<br>HLA-DRB1,<br>CDK5R1, FKBP5 |
| GO:0005887 | integral component | 29 | 4.98E-04 | CX3CR1, SLC22A4, C5AR1,                                                                                                                                                                                                                                                                                                               |



of plasma membrane

AQP9, SLC40A1, FPR1,  
LTB4R, ANPEP, CD58,  
CD55, HLA-DQA1, CD52,  
CR1, MME, SLC11A1,  
PLAUR, KCNJ15, NKG7,  
HLA-C, CD8A, CEACAM4,  
IL2RB, SLC26A8, BPI,  
CD46, RGR, TLR4,  
HLA-DRB1, TLR2

GO:0005576

extracellular region 28

0.006559638

CDA, ORM1, PSG11,  
LILRA2, TREM1, LILRA3,  
CXCL16, PROK2, S100A12,  
PGLYRP1, CD55, CAMP,  
IL1R2, GZMA, FLT3LG,  
HLA-C, MMP9, F5,  
GZMK, GZMM, LRG1,  
NOV, CRISPLD2, CD8A,  
TCN1, UTS2,  
HIST1H4H, FOLR3

GO:0005615

extracellular space 26

0.002455719

RTN3, CSTA, ORM1,  
HMGB2, CXCL16, SDCBP,  
GNLY, ANPEP, CAMP,  
ARG1, FLT3LG, OLFM4,  
PRSS33, MMP9,  
HIST2H2BE, SULF2,  
F5, LRG1, TCN1,  
VNN3, CPD, UTS2,

|            |                                                                     |    |             |                                                                                                                        |
|------------|---------------------------------------------------------------------|----|-------------|------------------------------------------------------------------------------------------------------------------------|
| GO:0009986 | cell surface                                                        | 13 | 0.009500746 | ALPL, BPI, CMTM2, ADA<br>CR1, C5AR1, HLA-C,<br>SULF2, CA4, ITGB7,<br>CD58, CD46, TLR4,<br>ADA, CD55,<br>HLA-DRB1, TLR2 |
| GO:0000139 | Golgi membrane                                                      | 12 | 0.039091233 | RTN3, NDST1, TPST1,<br>ST6GALNAC2, HLA-C,<br>CHST13, KIAA0319L,<br>HLA-DRB1, CD55,<br>HLA-DQA1, B4GALT5,<br>F5         |
| GO:0031225 | anchored component<br>of membrane                                   | 11 | 2.29E-07    | CD52, BST1, MMP25,<br>FCGR3B, VNN2, VNN3,<br>CA4, PLAUR, ALPL,<br>CD58, CD55                                           |
| GO:0043020 | NADPH oxidase<br>complex                                            | 4  | 2.12E-04    | NCF1, NCF4, NCF1B,<br>NCF1C                                                                                            |
| GO:0031234 | extrinsic component<br>of cytoplasmic side<br>of<br>plasma membrane | 4  | 0.031882704 | ZAP70, MATK,<br>BMX, TGM3                                                                                              |
| GO:0042101 | T cell receptor<br>complex                                          | 3  | 0.014093588 | ZAP70, CD8A, CD3D                                                                                                      |
| GO:0042613 | MHC class II<br>protein complex                                     | 3  | 0.020722333 | HLA-C, HLA-DRB1,<br>HLA-DQA1                                                                                           |
| GO:0071556 | integral component<br>of<br>luminal side of                         | 3  | 0.034778815 | HLA-C, HLA-DRB1,<br>HLA-DQA1                                                                                           |

|                           |                                                                  |    |             |                                   |  |
|---------------------------|------------------------------------------------------------------|----|-------------|-----------------------------------|--|
|                           | endoplasmic<br>reticulum<br>membrane                             |    |             |                                   |  |
| GO:0001772                | immunological<br>synapse                                         | 3  | 0.046506321 | ZAP70, GZMA, LAT                  |  |
| GO:0032010                | phagolysosome                                                    | 2  | 0.039994899 | NCF1, NCF4                        |  |
| <b>Molecular Function</b> |                                                                  |    |             |                                   |  |
| GO:0004872                | receptor activity                                                | 14 | 3.30E-07    | SLC40A1, PLAUR, LILRA2, TREM2     |  |
| GO:0042803                | protein<br>homodimerization<br>activity                          | 14 | 0.034737976 | CDA, HIP1, GCA, CEBPD, GZML       |  |
| GO:0046982                | protein<br>heterodimerization<br>activity                        | 12 | 0.007876517 | HIST2H2AA3, SDCBP, HIP1, GCM2     |  |
| GO:0003824                | catalytic activity                                               | 9  | 6.69E-04    | HAL, MGAM, PFKFB3, ACSM3, GZMM    |  |
| GO:0030246                | carbohydrate binding                                             | 7  | 0.014905314 | MGAM, CLEC4D, KLRB1, CLC1, GZMM   |  |
| GO:0004252                | serine-type<br>endopeptidase<br>activity                         | 7  | 0.045669734 | GZMK, GZMM, GZMA, PRSS33          |  |
| GO:0001618                | virus receptor<br>activity                                       | 6  | 7.16E-04    | CR1, ANPEP, ITGB7, CD46, HLA-DQA1 |  |
| GO:0043325                | phosphatidylinositol-<br>3,4-bisphosphate<br>binding             | 5  | 1.09E-04    | HIP1, NCF1, NCF1B, NCF1C, GZMM    |  |
| GO:0035091                | phosphatidylinositol<br>binding                                  | 5  | 0.010898769 | HIP1, NCF1, NCF4, NCF1B, NCF1C    |  |
| GO:0016176                | superoxide-<br>generating NADPH<br>oxidase activator<br>activity | 4  | 1.16E-04    | NCF1, NCF4, NCF1B, NCF1C          |  |
| GO:0016175                | superoxide-<br>generating NADPH<br>oxidase activity              | 3  | 0.005283765 | NCF1, NCF1B, NCF1C                |  |
| GO:0050786                | RAGE receptor<br>binding                                         | 3  | 0.005283765 | FPR1, HMGB2, S100A12              |  |
| GO:0032395                | MHC class II<br>receptor activity                                | 3  | 0.009822768 | HLA-C, HLA-DRB1, HLA-DQA1         |  |
| GO:0001530                | lipopolysaccharide<br>binding                                    | 3  | 0.020632864 | BPI, TLR4, TLR2                   |  |
| GO:0045296                | cadherin binding                                                 | 3  | 0.022449496 | OLFM4, CD46, CDK5R1               |  |

|            |                                          |   |             |                           |
|------------|------------------------------------------|---|-------------|---------------------------|
| GO:0042605 | peptide antigen binding                  | 3 | 0.032456863 | HLA-C, HLA-DRB1, HLA-DQA1 |
| GO:0032266 | phosphatidylinositol-3-phosphate binding | 3 | 0.041488027 | HIP1, PLEKHF1, NCF4       |
| GO:0017159 | panthetheine hydrolase activity          | 2 | 0.030084164 | VNN2, VNN3                |
| GO:0001875 | lipopolysaccharide receptor activity     | 2 | 0.049638648 | TLR4, TLR2                |

---
